# Supplementary material for: Hygroscopic Aerosols Amplify Longwave Downward Radiation in the Arctic
Source: Copernicus journal article supplement (doi:10.5194/egusphere-2024-2241), 2024-09-04
Supplement: Supplementary file [file egusphere-2024-2241-AC1-supplement.pdf]

## Response to Comments of reviewer 1

The authors thank both reviewers for their constructive comments and suggestions, which have helped us to improve the quality of this paper both in sciences and writing. The response in black letters follows each comment in blue.

### General

This manuscript investigates the roles of hygroscopic aerosols in Arctic longwave downward radiation. This is an interesting and potentially important topic as the Arctic is changing rapidly. Most of the methods and analyses are reasonable and clearly presented. My only concern is the impact of potential cloud scenes on the estimated ARE – the numbers are high for  $RH > 80\%$  and almost comparable with the cloud effect. This finding is significant if the signals are truly from wet aerosols. However, further examination of the measurement data is needed to exclude cloud contamination, especially from nearby regions around the surface site. The manuscript is otherwise well written, and I recommend returning it to the authors for minor revision. A major revision is appropriate if substantial work is needed to examine the measurements.

Response:

Based on the reviewer's concern about the "potential cloud scenes", we first checked all the data and method we used, including FTS observation and BSRN dataset. After updating the dataset, the aerosol infrared radiative effect (ARE) induced by aerosol wet growth remains evident, and the magnitude is more reasonable compared to the earlier version. The detailed updates are as follows:

#### 1. FTS Observations:

Initially, given the small field of view (FOV) of the FTIR instrument (3.3 mrad), we focused on vertical cloud screening, using our Cloudnet-radar, assuming this would be sufficient. In the Arctic, where cloud heights are typically assumed to be around 1 - 5 km, the FOV at this altitude corresponds to a radius of approximately 8.25 m. While the movement speed of high-altitude clouds is uncertain, we removed any data associated with potential cloud signals detected within 30 minutes before and after the observation time. This approach ensures that the FOV is cloud-free. With this stricter screening, the consistency between the FTIR observations and model simulations improved. The model-simulated sea salt concentration was approximately 500 particles/cm<sup>3</sup>, a value consistent with known Arctic observations.

Based on these updates, we have added the following sentences:

(L153-155) "Considering the small field of view (FOV) of the FTIR instrument (3.3 mrad), we excluded any data with cloud signals were detected within 30 minutes before or after the observation time. This method ensures that the FTIR's FOV remains cloud-free during the analysis."

#### 2. BSRN Observations:

For the BSRN data with all-sky observation ( $\text{FOV} = \pi \text{ rad}$ ), we considered the possibility that cloud contamination might persist even if no clouds were detected by Cloudnet within 90 minutes before and after 12:00 UTC. To address this, we introduced an additional criterion: if cloud signals from Cloudnet were detected outside this 180-minute window, the corresponding data were flagged as cloud-contaminated and excluded from our aerosol radiative effect (ARE) calculations. This stricter criterion ensures that the remaining data represents whole day cloud-free sky conditions.

However, we acknowledge that this approach might be overly conservative for aerosols. For example, thick clouds located near the horizon, despite their optical thickness, contribute less to the overall signal due to the high zenith angle ( $\sin(\theta) \rightarrow 0$ ). In such cases, aerosols at the zenith might still dominate the observed ARE.

We now provide a figure as a schematic illustration of our cloud contamination search. We also added the following sentences:

(L254-258)“Besides, we also consider the possibility that cloud contamination might persist despite the absence of detectable clouds within the 180-minute window before and after 12:00 UTC. To address this consideration, an additional criterion is implemented: data are flagged as cloud-contaminated and excluded from the aerosol radiative effect calculations if cloud signals were detected by Cloudnet outside this 180-minute window. This enhanced screening method ensures that the remaining dataset represents cloud-free sky conditions.”

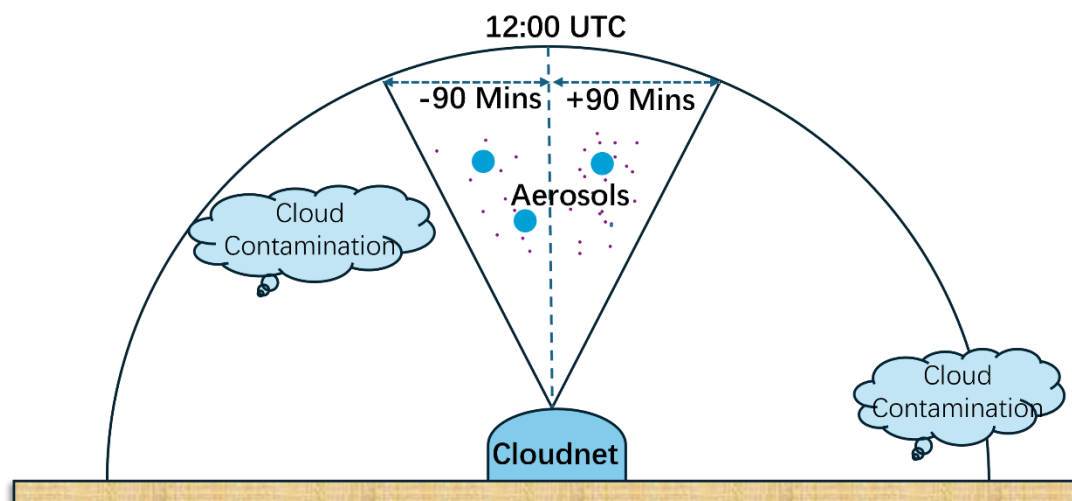

Figure 1: A schematic illustration of the cloud contamination.

Minor

L151-153: what is the field of view of FTS? Do you restrict the area coverage that needs to be cloud-free from Cloudnet? Multiple scattering could contribute to the FTS measurement if cloud is present in nearby regions.

Answer: The field of view (FOV) of the FTIR is 3.3 mrad. In the new version of our manuscript, we have added the following sentences (mentioned before when response to the major comments):

(L153-155) “Considering the small field of view ... remains cloud-free during the analysis”.

L160: please define LBLDIS

Answer: The LBLDIS model is the Line-By-Line Radiative Transfer Model coupled with DIScrete Ordinates Radiative Transfer Model. In the new version of our manuscript, we have added this information:

(L164-166)” ..., which can be calculated using the LBLDIS model (Line-by-Line Radiative Transfer Model coupled with DIScrete Ordinates Radiative Transfer Model, and details of this model are given in the Sec.4.2.) ”

Figure 1: The ARE from measurements for sea salt-dominated scenarios (b) can be comparable to 5000/cm<sup>3</sup> of sea salt in simulations. Is this a reasonable sea salt number concentration in the Arctic winter? This raises a concern about whether the sky is truly cloud-free in observations.

Answer: 5000 particles/cm<sup>3</sup> is indeed too high to be practical in the Arctic. This is only a theoretical calculation and is not comparable to observations. In our modified version, we removed the case of 5000 particles/cm<sup>3</sup> from the new figure 1. With this stricter screening method applied to FTIR as mentioned in the response to the major comments, the consistency between the FTIR observations and model simulations improved. The model-simulated sea salt concentration was approximately 500 particles/cm<sup>3</sup>, a value consistent with known Arctic observations. We have updated the data in the new version, see Figure 1, and for convenience we also present this new version at the end of the reply. In the new version of our manuscript, we have added this information:

(L286-291)”Moreover, the FTIR observations align closely with model simulations ( sea salt case with a number concentration of 500 cm<sup>-3</sup>). Both observations and simulations show that during the early stages of aerosol wet growth (75% < RH < 80%), the aerosol infrared radiative effect increases from approximately 1 – 2 Wm<sup>-2</sup> to 10 Wm<sup>-2</sup>. Subsequently, as RH approaches 90%, the ARE reaches about 20Wm<sup>-2</sup>.”

Figure 2: there is a white line at 180. This might be because the lat/lon do not overlap or connect in the array for 180E and 180W. To get rid of this, you can manually add an extra column in your data array. Suppose you have a [90, 360] shaped data, you add the 361st column that is identical to the 1st column and, correspondingly, your coordinate arrays. Then, you plot the [90, 361] shaped array. This should make the contour connected.

Answer: Corrected.

L321-325: then do you still consider the ARE values at RH levels above 80% valid for aerosols (e.g., the beginning of Section 6)? And I assume the RH here is with respect to liquid, right? During the Arctic winter, RH of 80% with respect to liquid could potentially be high enough for ice cloud formation. Distinguishing cloud and aerosol conditions is vital for the estimated ARE for hygroscopic aerosols.

Answer: The RH referenced here is relative to liquid water. We agree that an RH of 80% relative to liquid water under Arctic winter conditions could potentially be high enough for ice cloud formation. However, it is important to note that the formation of ice clouds generally requires specific ice-nucleating particles (INPs), such as dust or black carbon aerosols, rather than hygroscopic aerosols like sea salt or sulfate. For the transformation from supercooled liquid droplets to ice clouds, extremely low temperatures (e.g., below -38°C) are typically required. In the temperature from 0°C to -38°C, hygroscopic aerosols are likely to remain in the liquid phase and act as supercooled droplets rather than forming ice clouds. Therefore, it is reasonable to treat hygroscopic aerosols as liquid droplets under these conditions, and their additional radiative effect (ARE) should still be considered valid.

In the new version of our manuscript, we have added the following information: (L310-314) Notably, we differentiate the potential radiative effect from the cloud contamination. In Fig.1c, when RH is 60% - 80%, the infrared radiative effect from aerosol only (orange and blue dots) can be about 20 Wm<sup>-2</sup>, which is comparable with the infrared radiative effect combined aerosol with potential cloud contamination (gray dots). However, when the environment becomes more humid (RH > 80%), differentiating the radiative effect between cloud and aerosol is challenging due to the observation method. This implies that the estimation of ARE with RH less than 80% is more reliable than that of RH>80%.

We added the following sentences in the discussion:

(L343-352)“Our study shows that wet aerosols have an additional warming effect. However, when the relative humidity exceeds 80%, Cloudnet always observes some cloud signals during the period beyond the 180-minute window in BSRN measurements. We cannot conclusively determine whether high values of LWD (> 40Wm<sup>-2</sup>) are solely caused by aerosols or are the result of cloud contamination (see Fig.1). Under the very humid conditions (RH > 80%), wet aerosols become activated and transform to cloud droplets. This phenomenon from BSRN observation aligns with our hypothesis, indicating that the observed ambient RH corresponds to the deliquescence point, such as 80% for sea salt (Peng et al., 2022). Given that the maximum ARE value for RH levels between 60% and 80% is approximately 36 Wm<sup>-2</sup>, values exceeding this threshold may attribute to cloud droplets. The results of this study indicate that when an instrument is unable to differentiate between the particle sizes of aerosols and cloud droplets with sufficient accuracy, utilizing the ARE or LWD to distinguish between aerosols and clouds can be a potential method. “

Figure 2. (New version of Figure 1 in re-submission manuscript) has been modified as shown below. The model simulation for the  $5000 \text{ cm}^{-3}$  case has been excluded. Figure (b) and (c) have been updated because of cloud signals.

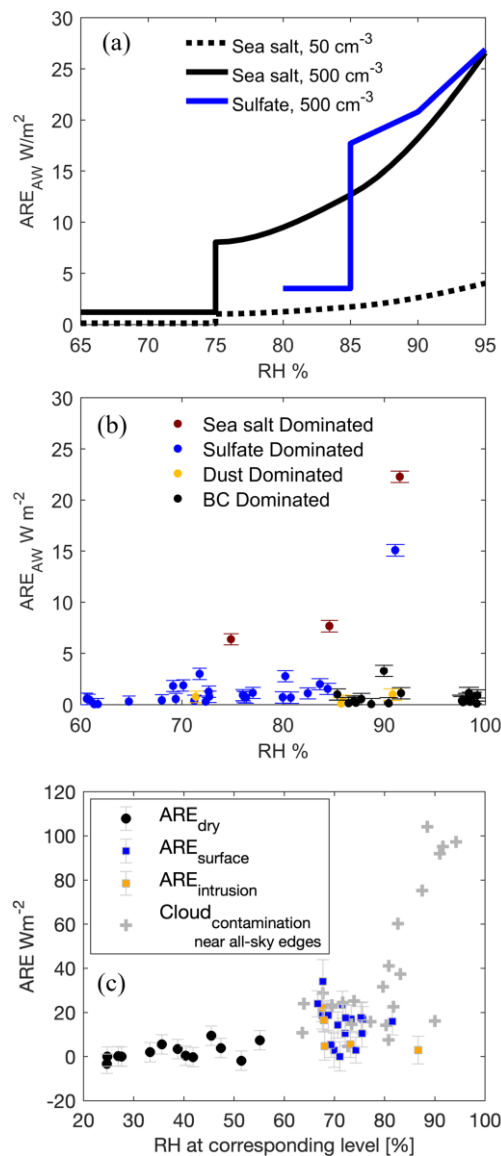

(a) Aerosol Radiation Effect ( $ARE_{AW}$ ) of sea salt (red, black and blue lines) and sulfate (black dotted line) as a function of RH, simulated by LBLDIS with different number density cases; (b) The  $ARE_{AW}$  of sea salt (brown), sulfate (blue), dust (yellow) and BC (black) dominant cases measured by emission FTIR (NYAEM-FTS). The aerosol composition retrieval method is given in Sec.4.3 and the methods is given by Ji et al. (2023); (c) ARE under different RH profile scenarios:  $ARE_{dry}$  (black) means that the entire atmosphere is in a dry state ( $RH < 60\%$ );  $ARE_{surface}$  (blue) means that there is a layer of high humidity ( $RH > 60\%$ ) near the ground ( $< 1 \text{ km}$ );  $ARE_{intrusion}$  (yellow) represents the situation with a layer of high humidity intrusion ( $RH > 60\%$ ) at high altitude ( $> 1 \text{ km}$ ). Grey crosses indicate cloud contamination. The error bars represent one standard deviation of the ARE calculated over a 3-hour period (10:30 - 13:30). Note:  $ARE_{AW}$  in this figure (a) refers to simulations and (b) refers to measurements by NYAEM-FTS in the AW region, and ARE in figure c refers to the results of measurements (BSRN) in the mid-infrared range.
